# Supplementary material for: Elevated FBXL6 expression in hepatocytes activates VRK2-transketolase-ROS-mTOR-mediated immune evasion and liver cancer metastasis in mice
Source: PubMed Central journal article supplement (PMC10618235; doi:10.1038/s12276-023-01060-7), 2023-09-01
Supplement: 12276_2023_1060_MOESM1_ESM.pdf [file 12276_2023_1060_MOESM1_ESM.pdf]

## **Supplementary information**

# **Elevated FBXL6 expression in hepatocytes activates VRK2-transketolase-ROS-mTOR-mediated immune evasion and liver cancer metastasis in mice**

## **Supplementary Materials and Methods**

### **Constructs**

Human and mouse FBXL6 and TKT genes were synthesized and subsequently cloned into the pCDNA3.1 expression vector with a 3xFlag or 3xHA tag for ectopic expression.

### **Isolation of primary hepatocyte cells**

The liver and portal tracts were exposed via a ventral midline incision, and a 22 G intravenous catheter was inserted into the portal vein. The liver was perfused at 7 mL/min via the portal vein for 10 min with pre-perfusion buffer (Gey's balanced salt solution (GBSS) without  $\text{Ca}^{2+}$  (NaCl: 7.0 g, KCl: 0.37 g,  $\text{MgSO}_4 \cdot 7\text{H}_2\text{O}$ : 70 mg,  $\text{Na}_2\text{HPO}_4 \cdot 12\text{H}_2\text{O}$ : 302 mg,  $\text{NaHCO}_3$ : 2.27 g,  $\text{KH}_2\text{PO}_4$ : 30 mg,  $\text{MgCl}_2 \cdot 6\text{H}_2\text{O}$ : 210 mg, glucose: 1.0 g, EDTA: 0.744 g, pH 7.4)) at 37°C until the liver was completely discoloured and for 10 min with perfusion buffer (GBSS (NaCl: 7.0 g, KCl: 0.37 g,  $\text{MgSO}_4 \cdot 7\text{H}_2\text{O}$ : 70 mg,  $\text{Na}_2\text{HPO}_4 \cdot 12\text{H}_2\text{O}$ : 302 mg,  $\text{CaCl}_2$ : 166 mg,  $\text{NaHCO}_3$ : 2.27 g,

KH<sub>2</sub>PO<sub>4</sub>: 30 mg, MgCl<sub>2</sub>·6H<sub>2</sub>O: 210 mg, glucose: 1.0 g, pH 7.4)) containing 0.16 mg/mL collagenase IV. After the two-step collagenase perfusion, the liver was excised, finely smashed by forceps in perfusion buffer, placed in a flask containing 0.16 mg/mL collagenase IV and 10 mg/mL DNase I, and placed in a shaking water bath at 37°C for 10 min. The resulting cell suspension was sequentially passed through a layer of 150-mesh nylon gauze to remove undigested tissue and a 70-mm cell strainer. The resulting single-cell suspension was obtained by pooling the filtered suspensions. The pellet was resuspended in PBS with 0.1% BSA and washed three times to remove debris and other contaminants.

### **Cell lines, proliferation and cell migration assays**

Mouse hepatocellular carcinoma Hepa1-6 cells were purchased from ATCC. Human Huh7 cells were purchased from the Cell Bank of Type Culture Collection of Fudan University (Shanghai, China). All cell lines tested negative for mycoplasma contamination. All experiments were carried out in DMEM medium containing 10% FBS, 100 U/mL penicillin and 100 mg/mL streptomycin (Invitrogen, USA) at 37°C and 5% CO<sub>2</sub>.

For cell proliferation, Hepa1-6 and Huh7 cells were transfected with the indicated plasmids or siRNA oligos for 24 or 48 h using Lipofectamine 3000 transfection reagent. Cells were then seeded into 96-well plates at 2000 cells per well, and cell proliferation was analyzed using the Cell Counting Kit-8 (Dojindo, Japan) assay. For cell migration, 5x10<sup>4</sup> cells were seeded into Transwell plates overnight,

stained with crystal violet (0.5% w/v) and imaged.

### Small interfering RNA (siRNA) transfection

The siRNA oligos were purchased from GenePharma Co. (Shanghai, China) as follows: human siTKT #1, 5'-CUGCCGAACUGCUGAAGAA-3'; human siTKT #2,

5'-CAGGAGAUCUACAGCCAGA-3'; mouse siTKT #1,

5'-CCGUGGACAUUGCUAACA-3'; mouse siTKT #2,

5'-GGAAUGUAUGACCACAGAUUU-3'; human siHNRNPF #1,

5'-GGAAGAAAUUGUUCAGUUC-3'; human siHNRNPF #2,

5'-GGUAUAUUGAAGUGUUUAAGA-3'; mouse siHNRNPF #1,

5'-GGUGUUCAUUUCAUUUAUACU-3'; mouse siHNRNPF #2,

5'-CCAAGCGAUGGAGUUGCAA-3'; human siFBXL6 #1,

5'-CACCGGCAUCAACCGUAAUAG-3'; human siFBXL6 #2, 5'-

UGGAGUGGCUUAUGCCCAAUC-3'; mouse siFBXL6 #1, 5'-

GCGAGAAGGACUUGGAACA-3'; mouse siFBXL6 #2, 5'-

CGGCUGCUGAAUCUGAUUU-3'; non-targeting siRNA (siControl),

5'-UUCUCCGAACGUGUCACGUTT-3'; 5'-UCUACGAGGCACGAGACUU-3'.

siRNA targeting VRK2 was purchased from Santa Cruz (sc-94622), and siJNK2 was

purchased from Santa Cruz (sc-39101). Briefly, cells were transfected with various

siRNAs in MEM medium with 90 nM of each siRNA duplex using Lipofectamine

3000 transfection reagent (Invitrogen) following the manufacturer's protocol.

## **RNA isolation and RT-qPCR and qPCR**

Total RNA was isolated from cells or liver tissues with TRIzol (Life Technologies) or RNAiso Plus (TaKaRa), respectively. RNA was quantified using a NanoDrop spectrophotometer. Complementary DNA synthesis was carried out using the High-Capacity cDNA Reverse Transcription Kit (Applied Biosystems). Quantitative PCR (qPCR) was performed using Fast SYBR Green (Applied Biosystems) on a 7900HT Fast Real-time PCR system (Applied Biosystems). The primers used in this study were listed (Supplementary Table 6)

## **Western blotting**

The treated cells were lysed in RIPA lysis buffer (Thermo Scientific, USA) containing a protease inhibitor mixture (Roche, Switzerland) on ice for 20 min. After centrifugation at 13000 rpm for 15 min at 4°C, the supernatant was collected, and the protein concentration was analyzed using a BCA protein assay reagent kit (Beyotime, China). Proteins were separated by SDS-PAGE (Beyotime, China) and then transferred to NC membranes (GE Healthcare, UK). Then, membranes were blocked with 5% nonfat milk and incubated with primary antibodies as follows: anti-mouse Flag (F1804, 1:2000, Sigma); anti-rat HA (12013819001, 1:2000, Roche); anti-rabbit FBXL6 (NBP1-31020, 1:1000, Novus Biologicals); anti-rabbit GAPDH (10494-1-AP, 1:5000, Proteintech); anti-rabbit VRK2 (DF2690, 1:1000, Affinity Bioscience); anti-rabbit PD-L1 (17952-1-AP, 1:1000, Proteintech); and anti-mouse transketolase (sc-390179, 1:1000, Santa Cruz Biotechnology) antibodies.

### **TKT polyubiquitination assay**

To examine the ubiquitination of TKT by FBXL6, 293T cells were transfected His-Ub and Flag-FBXL6 with HA-TKT, HA-TKT (K319A), or HA-TKT (K16A). After 72 h of transfection, cells were treated with 10  $\mu$ M MG132 for 4 h before harvest for the in vivo ubiquitination assay. The in vivo ubiquitination assay was performed as described previously using Ni-bead pull-down assays. In brief, the cells were lysed in buffer A (6 M guanidinium-HCl, 0.1 M Na<sub>2</sub>HPO<sub>4</sub>/NaH<sub>2</sub>PO<sub>4</sub>, 10 mM Tris-HCl (pH 8.0), 5 mM imidazole and 10 mM  $\beta$ -mercaptoethanol) on ice for 1 h, followed by exposure to 50  $\mu$ L Ni-NTA beads (Qiagen, Valencia, CA) overnight. After incubation, beads were washed with buffer A plus 10 mM  $\beta$ -mercaptoethanol, buffer B (8 mM urea, 0.1 M Na<sub>2</sub>HPO<sub>4</sub>/NaH<sub>2</sub>PO<sub>4</sub>, 10 mM Tris/HCl, (pH 8.0), 10 mM  $\beta$ -mercaptoethanol), buffer C (8 mM urea, 0.1 M Na<sub>2</sub>HPO<sub>4</sub>/NaH<sub>2</sub>PO<sub>4</sub>, 10 mM Tris/HCl (pH 6.3), 10 mM  $\beta$ -mercaptoethanol, 0.2% Triton X-100), and buffer C plus 10 mM  $\beta$ -mercaptoethanol and 0.1% Triton X-100. His6-tagged ubiquitinated proteins were then eluted by buffer D (200 mM imidazole, 0.15 M Tris-HCl (pH 6.7), 30% glycerol, 0.72 M  $\beta$ -mercaptoethanol, 5% SDS), respectively. The eluate was analyzed using Western blotting.

### **Immunohistochemistry (IHC) staining assay**

Briefly, tissues were fixed in 10% formalin and then embedded in paraffin. Sections of 5  $\mu$ m were stained with H&E for histopathological examination or IHC staining with anti-rabbit FBXL6 (NBP1-31020, 1:100, Novus Biologicals),

anti-mouse transketolase (sc-390179, 1:100, Santa Cruz Biotechnology), anti-rabbit p-TKT(Th287) (generated by PTM Bio), anti-rabbit PD-L1 (#13684, 1:1000, Cell Signaling Technology); anti-rabbit CCNB2 (21644-1-AP, 1:200, Proteintech), anti-mouse MMP9 (10373-2-AP, 1:200, Proteintech), and anti-mouse Ki67 (550609, 1:100, BD Pharmingen) antibodies. The staining was evaluated by different specialized pathologists without any knowledge of the patient characteristics. The staining intensity was determined using the Spot Denso function of AlphaEaseFC software. The number of positively stained cells per 500 cells was recorded.

### **Co-immunoprecipitation (co-IP) assay**

To examine the direct interaction between FBXL6 and TKT, Huh7, Hepa1-6, and HEK293T cells were transfected with Flag-FBXL6 alone or in combination with HA-TKT plasmids for 48 h, followed by lysis in immunoprecipitation lysate buffer (20 mM Tris-HCl, pH 8.0, 100 mM NaCl, 1% NP-40 with protease inhibitor) for 20 min on ice. Cell lysates were collected by centrifugation at 10000 g for 10 min at 4°C, and then 1-10 µL (0.2-2 µg) primary antibodies was added. After incubation for 1 h at 4°C, 50 µL Protein A/G PLUS-Agarose (Santa Cruz Biotechnology, USA) was added to the protein-antibody complex and incubated at 4°C overnight. Immunoprecipitates were washed three times with immunoprecipitation buffer. A 2x sample loading buffer was added to the beads before boiling for 5 min. The supernatant was collected and used in the Western blotting assay.

### **In vitro ubiquitination assay**

Flag-FBXL6 was precipitated from Flag-FBXL6 transfected HEK293 cells by protein A/G-beads(Santa), serving as the source of E3. HA-TKT and HA-TKT mutant (T287A) were precipitated from HA-TKT or HA-TKT mutant (T287A) transfected HEK293 cells, and eluted with 3xHA peptide (Beyotime), serving as the source of substrates. The reaction was carried out at 30°C for 2 h in 30 mL reaction buffer (40 mM Tris-HCl, pH 7.5, 2 mM DTT, 5 mM MgCl<sub>2</sub>) in the presence of Flag-FBXL6 (bound to protein A/G beads), ubiquitin (Boston Biochem), E1 (Boston Biochem), recombinant UbcH5c/E2 (Boston Biochem), ATP, and HA-purified TKT or its mutant T287A. After the reaction, the beads were washed three times with cell lysis buffer to remove non-TKT conjugated ubiquitin. The washed beads were then resuspended in 25  $\mu$ L 2xSDS-PAGE sample buffer for SDS-PAGE and detected by Western blotting with antibodies against HA.

### **ROS, NADPH and TKT enzymatic assays**

For ROS assays, an equal number of cells were stained with 10  $\mu$ M 2',7'-dichlorodihydrofluorescein diacetate (DCFHDA) (Life Technologies) and analyzed by BD FACSCanto II Analyzer. For the NADPH/NADP<sup>+</sup> ratio, NADPH and NADP<sup>+</sup> were measured by an NADPH/NADP<sup>+</sup> detection kit (Beyotime) according to the manufacturer's instructions. Briefly, HCC cells were lysed by NADP<sup>+</sup>/NADPH extraction buffer (Beyotime). A portion of the samples was unheated, and another portion was heated at 60°C for 30 min for NADP decomposition. Heated and

unheated samples were incubated with NADPH developer at 37°C for 30 min in the dark and measured at OD450 using a plate reader. The NADPH/NADP<sup>+</sup> ratio was calculated by the following equation: (intensity of heated)/(intensity of unheated-heated samples). For TKT activity, cell lysates were harvested and added TKT reaction mix and immediately started recording fluorescence (Ex/Em = 535/587 nm) at 30 sec intervals for 30-45 min at 37°C using TKT activity kit (Biovision; # K2004-100) according to the manufacturer's instructions. Sample TKT Specific Activity =  $\Delta M \times D / (\Delta t \times P)$  (pmol / (min x  $\mu$ g)) =  $\mu$ Units/ $\mu$ g or mUnits/mg. Where  $\Delta M$  = G3P concentration from the Standard Curve (pmol);  $\Delta t$  =  $t_2 - t_1$  (min); D = Sample dilution factor; and P = Sample used (in  $\mu$ g).

### **Proteomics, phosphoproteomics and ubiquitomics analysis**

Liver tissues were added to four volumes of lysis buffer (8 M urea, 1% Protease Inhibitor Cocktail), followed by sonication three times. The remaining debris was removed by centrifugation at 12,000 g at 4°C for 10 min. The protein concentration was determined with a BCA kit according to the manufacturer's instructions. For digestion, the protein was reduced with 5 mM dithiothreitol for 30 min at 56°C and alkylated with 11 mM iodoacetamide for 15 min at room temperature in darkness. Finally, trypsin was added overnight for digestion. For LC-MS/MS analysis, the tryptic peptides were dissolved in 0.1% formic acid (solvent A) and directly loaded onto a homemade reversed-phase analytical column (15-cm length, 75  $\mu$ m i.d.). The gradient was comprised of an increase from 6% to 23% solvent B (0.1%



formic acid in 98% acetonitrile) over 26 min, 23% to 35% in 8 min and climbing to 80% in 3 min and then holding at 80% for the last 3 min, all at a constant flow rate of 400 nL/min on an EASY-nLC 1000 UPLC system. The peptides were subjected to NSI source followed by tandem mass spectrometry (MS/MS) in Q Exactive Plus TM (Thermo Scientific) coupled online to the UPLC. The electrospray voltage applied was 2.0 kV. The m/z scan range was 350 to 1800 for full scan, and intact peptides were detected in the Orbitrap at a resolution of 70,000. Peptides were then selected for MS/MS using the NCE setting of 28, and the fragments were detected in the Orbitrap at a resolution of 17,500. A data-dependent procedure that alternated between one MS scan followed by 20 MS/MS scans with 15.0 s dynamic exclusion. Automatic gain control (AGC) was set at 5E4. The fixed first mass was set as 100 m/z. The resulting MS/MS data were processed using the Maxquant search engine (v.1.5.2.8). *P*-values < 0.05 and fold changes of 1.2 (proteome data) and 1.5 (ubiquitome data) were considered significant.

## Supplementary figure and legends

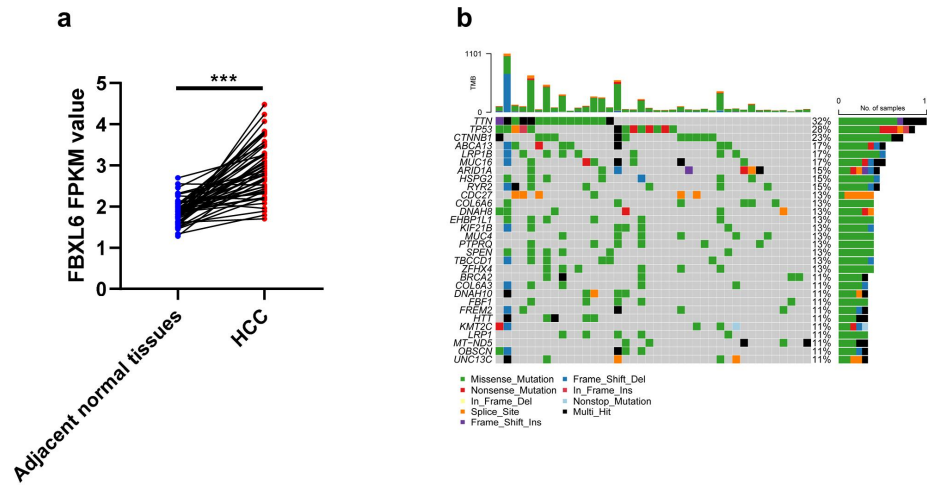

**Fig. S1. Expression of FBXL6 in HCC and mutational profiles for the FBXL6 overexpressed HCC patients**

**a** The FBXL6 mRNA level in 50 paired HCC and adjacent normal tissues was statistically analyzed in TCGA database. **b** The panel showing the mutational profiles for HCC patients with high FBXL6 expression. Two-tailed unpaired t-test was used in **(a)**.  $***p \leq 0.001$ .

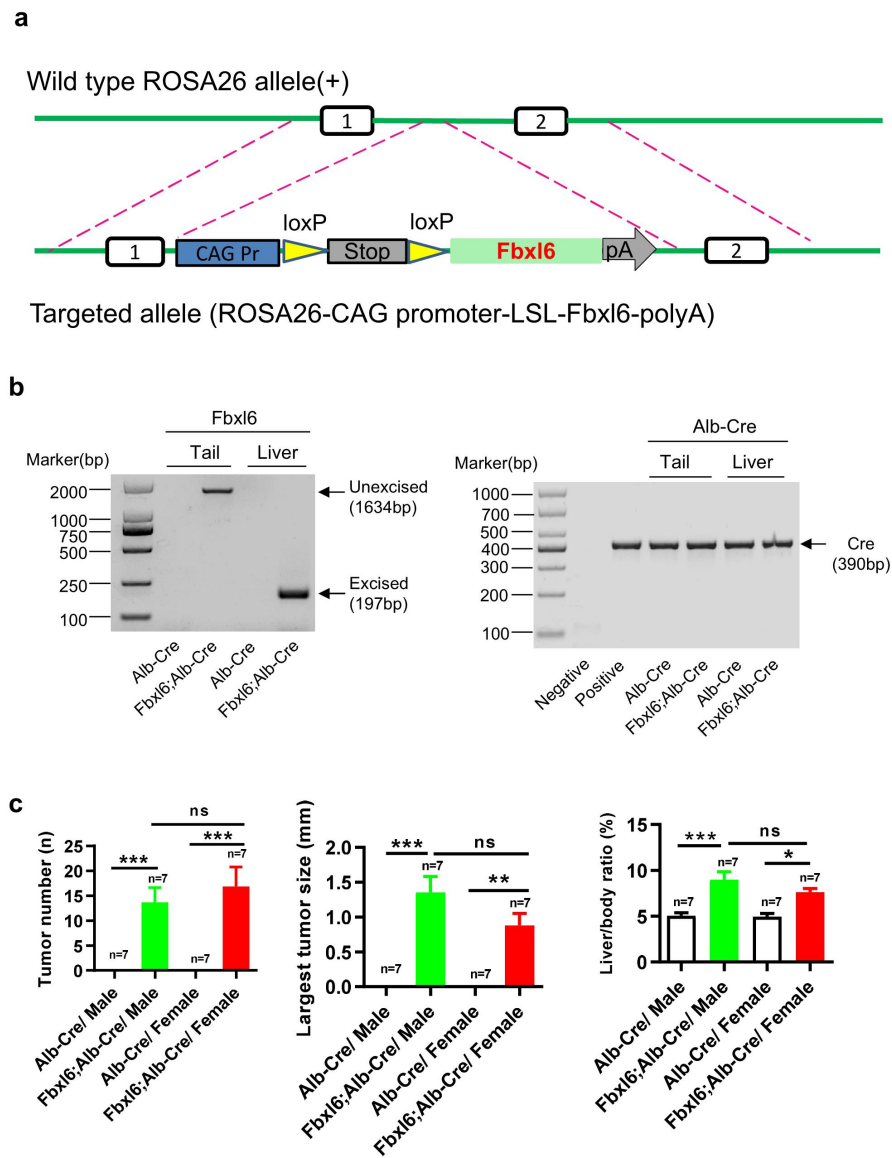

**Fig. S2. FBXL6 promotes sex-independent hepatocarcinogenesis in vivo**

**a** The scheme of the transgene construction of FBXL6 mice. **b** DNA was isolated from tails or livers of the indicated genotype and subjected to PCR genotyping for *Flox-Fbxl6*. **c** The tumor number, largest tumor size and liver/body weight ratio in 310-day female and male mice were compared. FBXL6 induced liver tumorigenesis independent of sex. Data are represented as the means  $\pm$  SEMs. One-way ANOVA with Bonferroni's multiple comparisons test was used.  $n = 7$  for each group. ns, nonsignificant.  $*p \leq 0.05$ ,  $**p \leq 0.01$ ,  $***p \leq 0.001$ .

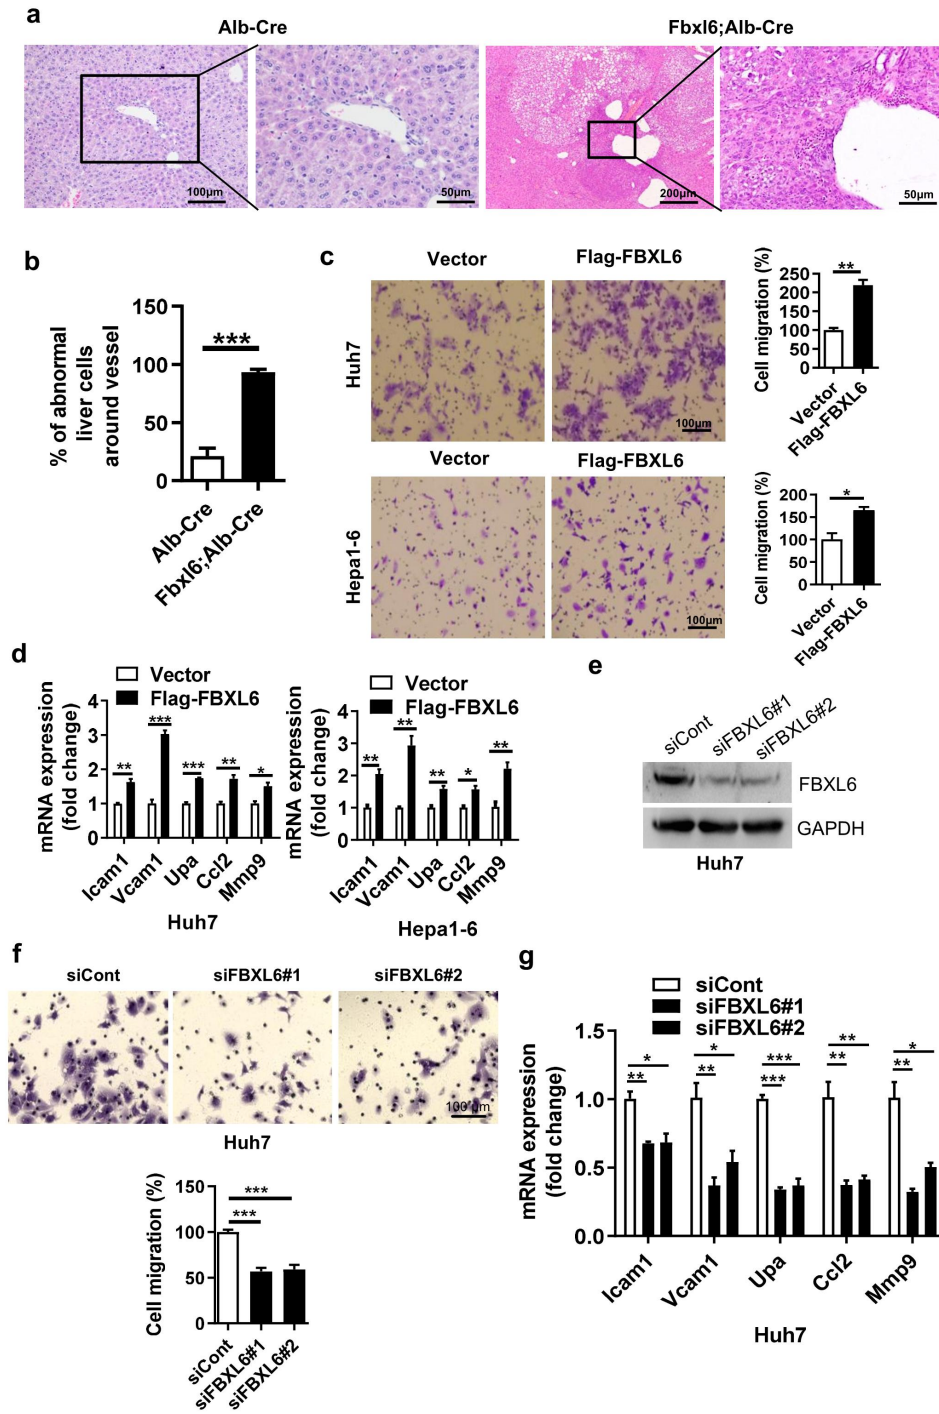

**Fig. S3. FBXL6 promotes HCC cell migration.**

**a** Representative images showing the HCC tumors around the blood vessels in *Fbx16;Alb-Cre* mice. Scale bar, 200, 100, or 50  $\mu\text{m}$ . **b** The abnormal cells around vessels were quantified ( $n = 8$  mice for each group). **c, d** Liver cancer cells (Huh7 or Hepa1-6) were transfected with Flag-FBXL6 for 48 h and were then replated into

Transwell plates overnight (**c**).  $n = 4$ , biological replicates; migration markers (*Icam1*, *Vcam1*, *Upa*, *Ccl2*, and *Mmp9*) were analyzed by qPCR (**d**).  $n = 3$ , biological replicates. **e-g** Huh7 cells were transfected with siRNA targeting FBXL6 (siFBXL6) for 48 h. A portion of cells were used for Western blotting (**e**). Another portion was reseeded into Transwell plates for migration analysis after overnight incubation (**f**). The other portions were used to analyze metastasis-related markers (*Icam1*, *Vcam1*, *Upa*, *Ccl2*, and *Mmp9*) by qPCR (**g**).  $n = 3$ , biological replicates; Data are represented as the means  $\pm$  SEMs. Scale bar, 100  $\mu$ m. Two-tailed unpaired t-test was used in (**b**, **c**); One-way ANOVA with Tukey's multiple comparisons test was used in (**f**); Two-way ANOVA with Bonferroni's multiple comparisons test was used in (**d**, **g**).  $*p \leq 0.05$ ,  $**p \leq 0.01$ ,  $***p \leq 0.001$ .

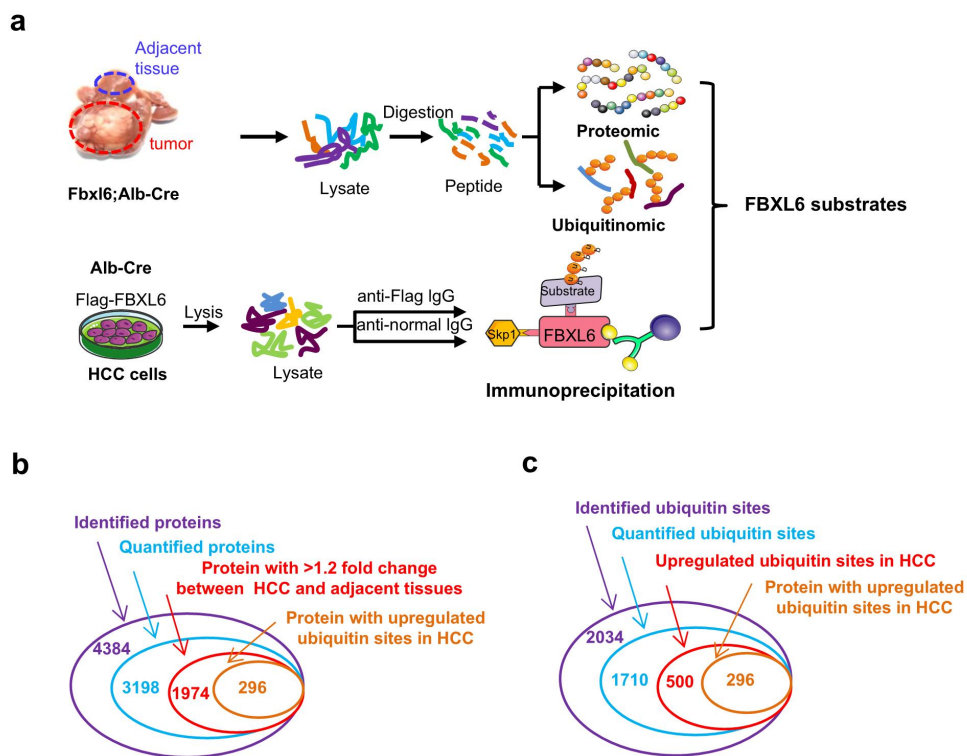

**Fig. S4. Proteomics and ubiquitomics features of HCC tumors in response to FBXL6 overexpression**

**a** Schematic of the multi-omics analyses of FBXL6-driven HCC tumors. The diagram shows the experimental process for the label-free proteomics, ubiquitomics, protein–protein interaction analysis of FBXL6. **b** The diagram showing the number of identified proteins (purple), quantified proteins (blue), proteins with significant changes (a cutoff of  $\geq 1.2$ -fold change; red), and proteins with upregulated ubiquitin sites (a cutoff of  $\geq 1.5$ -fold change; orange) in HCC tumors. **c** The diagram showing the number of identified ubiquitin sites (purple), quantified ubiquitin sites (blue), upregulated ubiquitin sites (a cutoff of  $\geq 1.5$ -fold change; red), and proteins with upregulated ubiquitin sites (a cutoff of  $\geq 1.2$ -fold change; orange) in HCC tumors.

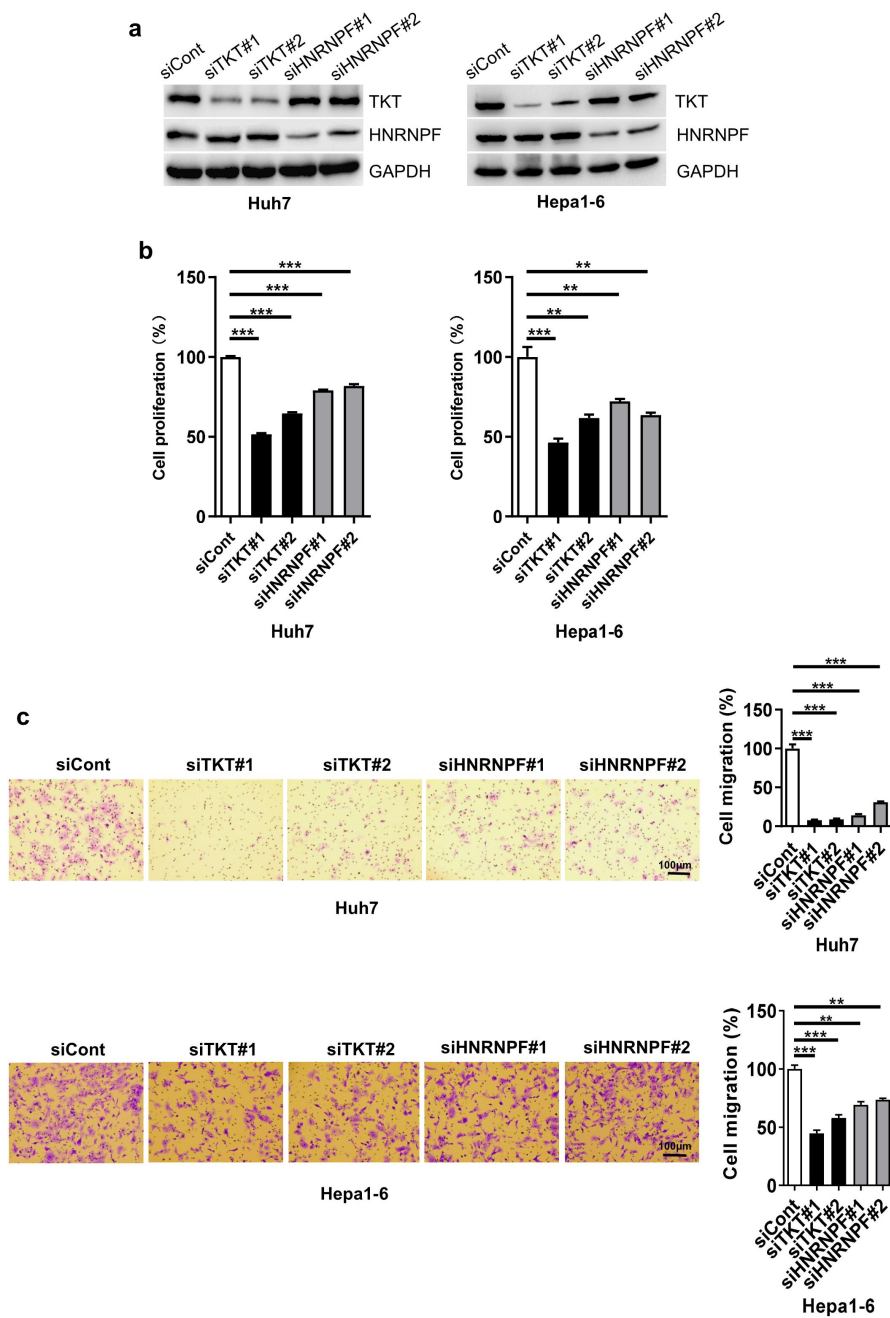

**Fig. S5. TKT knockdown dramatically inhibits cell proliferation and migration in HCCs compared with HNRNPF knockdown**

**a-c** Huh7 and Hepa1-6 cells were transfected with indicated siRNA oligos for 48 h, followed by Western blotting with indicated antibodies (**a**), cell proliferation analysis using CCK-8 assay (**b**), or cell migration assay (**c**). One-way ANOVA with Tukey's multiple comparisons test was used.  $**p \leq 0.01$ ,  $***p \leq 0.001$ .

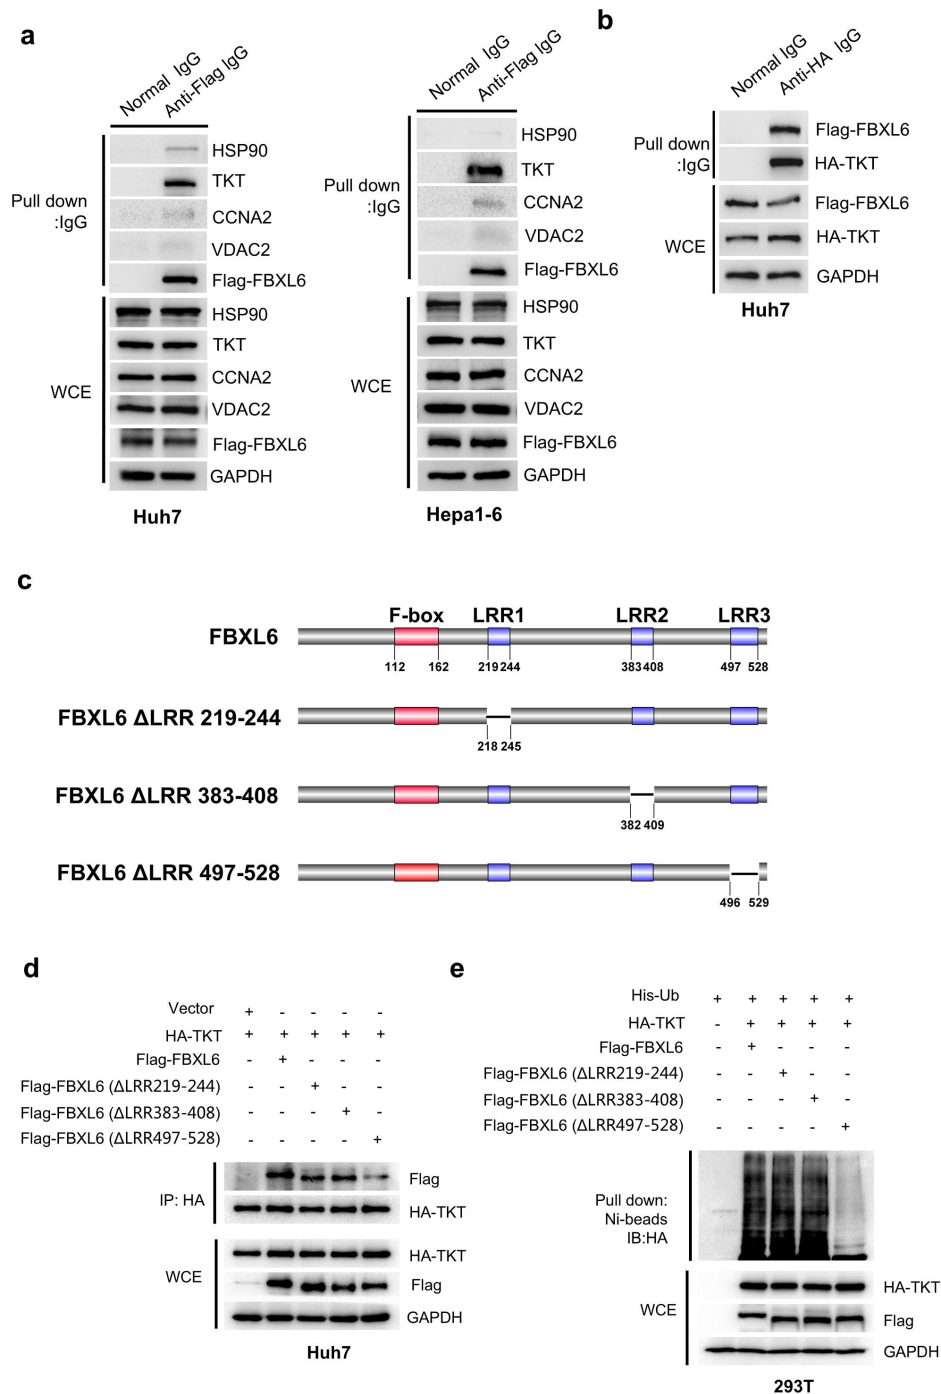

**Fig. S6. FBXL6 LRR497-528 domain binds with TKT**

**a, b** FBXL6 binds with TKT rather than other potential substrates in HCCs. Huh7 or Hepa1-6 cells were transfected with Flag-FBXL6 or HA-TKT plasmids for 45 h, followed by treatment with 3 h MG132 (10  $\mu$ M) and lysis in RIPA buffer. Lysates



were added to the indicated antibodies and Protein A/G PLUS-Agarose. **c** Schematic structure of leucine-rich repeat (LRR) domain mutants in human FBXL6. **d** Huh7 cells were transfected HA-TKT with Flag-FBXL6 or its mutants for 48 h and then followed by co-IP with anti-HA antibody. **e** HEK293T cells were transfected HA-TKT and his-Ub with Flag-FBXL6 or its mutants for 45 h and then treated with 3 h MG132 (10  $\mu$ M) . Cells were lysed in RIPA buffer, followed by pull-down with Ni-NTA beads or direct Western blotting with the indicated antibodies.

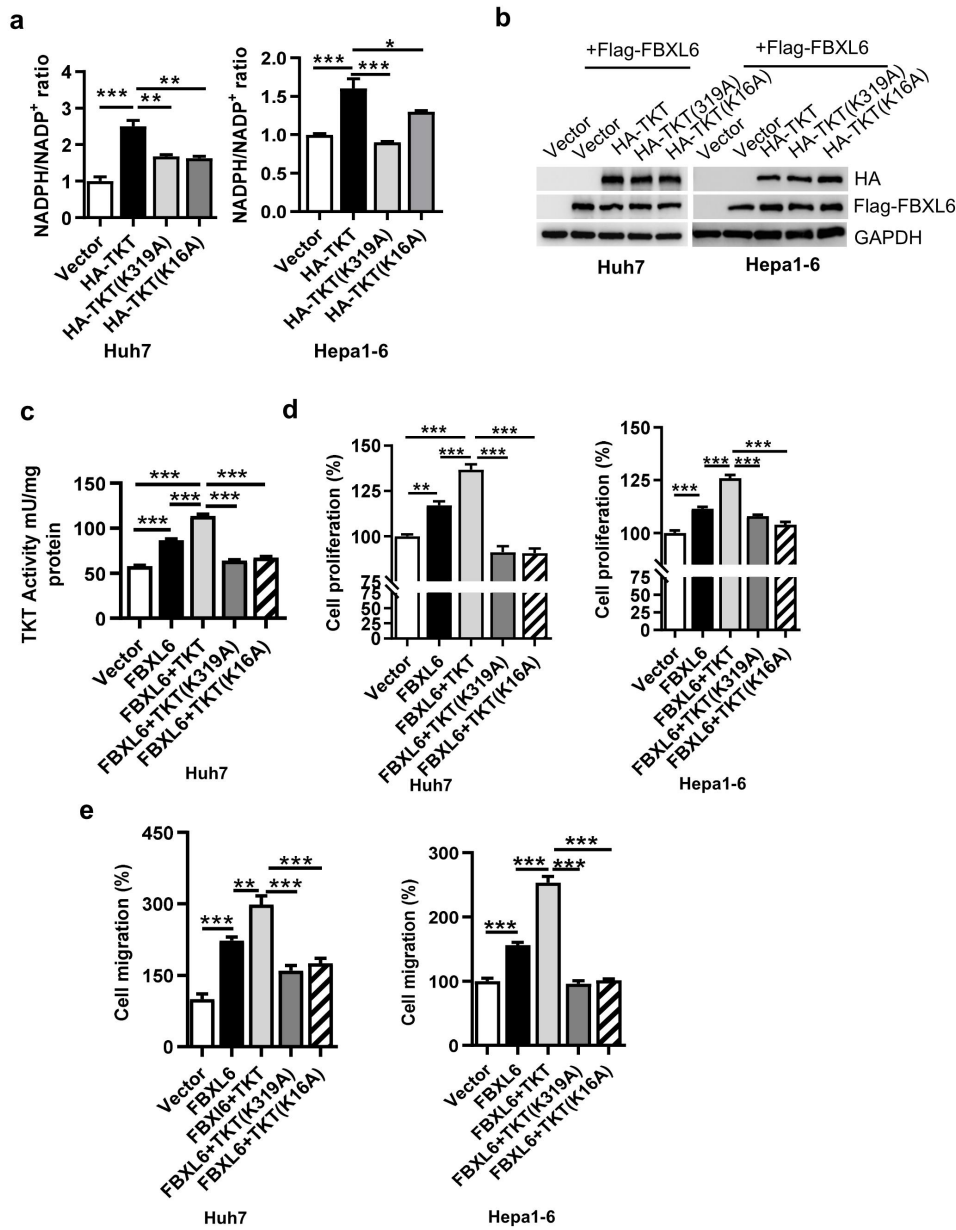

**Fig. S7. K16 and K319 mutants in TKT attenuate TKT activity and inhibit cell migration**

**a** Huh7 or Hepa1-6 cells were transfected with the indicated plasmids for 48 h. The NADPH/NADP<sup>+</sup> ratio was measured using an NADPH/NADP<sup>+</sup> detection kit.  $n = 3$ , biological replicates. **b-e** Huh7 or Hepa1-6 cells were transfected Flag-FBXL6 with HA-TKT, HA-TKT (K319A), or HA-TKT (K16A) for 48 h. A portion of the cells

were harvested for Western blotting **(b)** or detection of TKT activity using a TKT specific activity kit **(c)**. Another portion was used for cell proliferation analysis **(d)**. Other portions were reseeded into Transwell plates for migration analysis **(e)**. One-way ANOVA with Tukey's multiple comparisons test was used.  $n = 3-4$ , biological replicates.  $*p \leq 0.05$ ,  $**p \leq 0.01$ ,  $***p \leq 0.001$ .

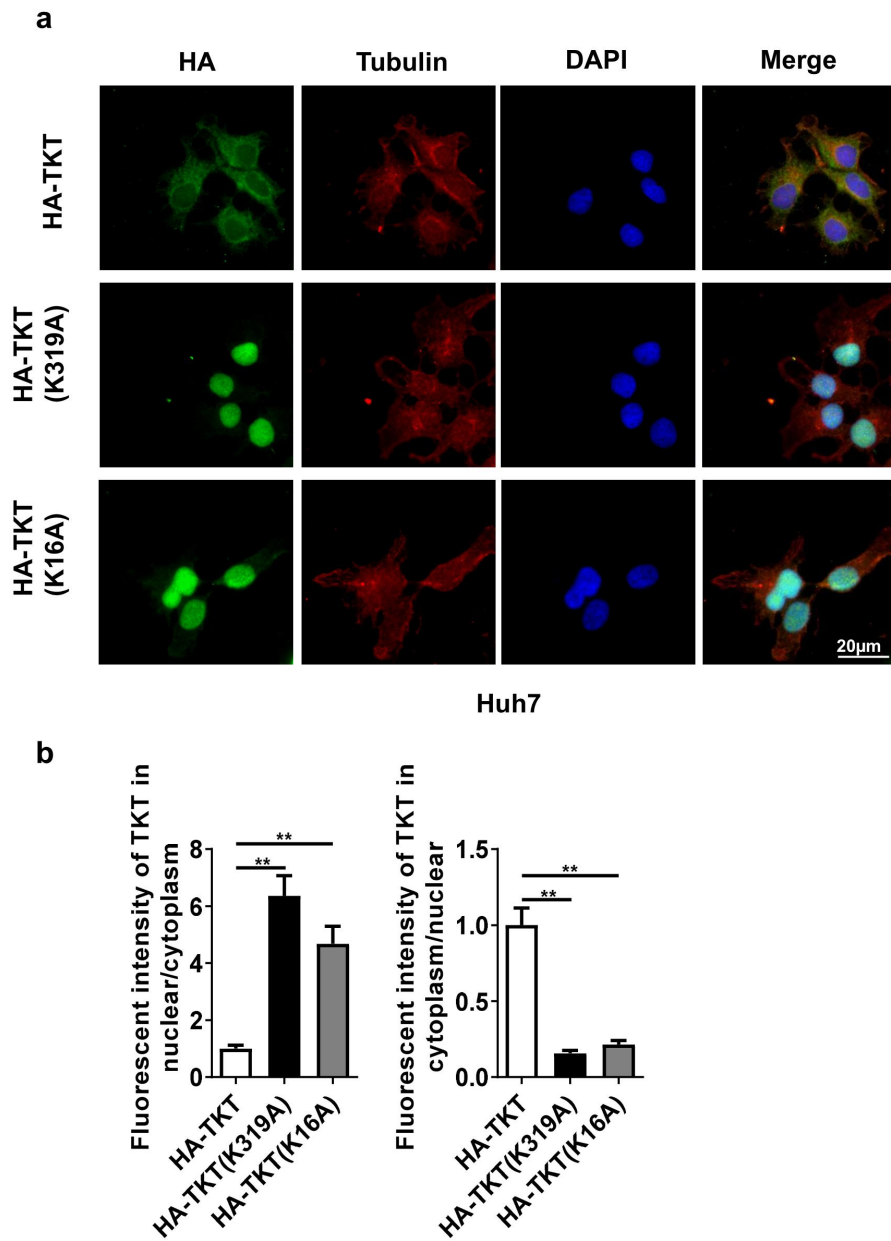

**Fig. S8. K16 and K319 mutants in TKT promote its nuclear localization**

**a, b** Huh7 cells were transfected with the indicated plasmids for 48 h and stained with anti-HA antibody. TKT wild-type localized at the cytoplasm, whereas its mutants (K16A and K319A) were in the nuclear (**a**). The nuclear and cytoplasmic fluorescence intensity in (**a**) was determined by ImageJ software (**b**). Scale bar, 20  $\mu\text{m}$ . One-way ANOVA with Tukey's multiple comparisons test was used.  $**p \leq 0.01$ .

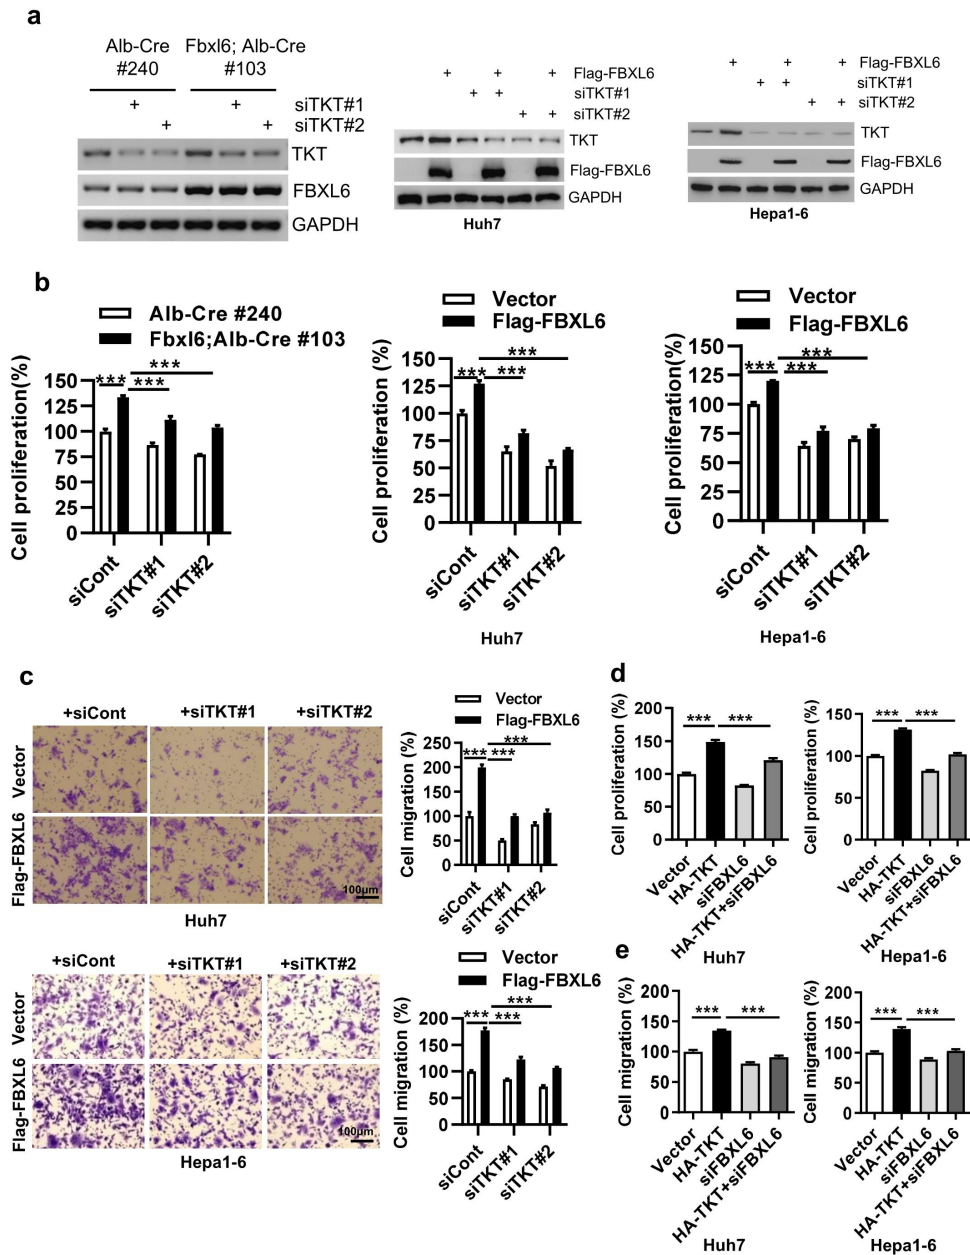

**Fig. S9. TKT knockdown blocks FBXL6-mediated cell proliferation and migration in primary hepatocytes and HCCs**

**a-c** Primary hepatocytes isolated from the age of 10 weeks *Alb-Cre* or *Fbxl6; Alb-Cre* mice, Huh7 and Hepa1-6 were transfected with indicated siRNA oligos for 48 h. A portion of cells was harvested for Western blotting (**a**). Another portion was plated into 96-well plates for 48 h and analyzed by CCK-8 assay (**b**). The other portions were seeded into Transwell plates for migration analysis (**c**). **d, e** Huh7 or Hepa1-6

cells were transfected HA-TKT with non-targeting siRNA control or siRNA targeting FBXL6 for 48 h. Another portion was plated into 96-well plates for 48 h and analyzed by CCK-8 assay (**d**). The other portions were seeded into Transwell plates for migration analysis (**e**).  $n = 3$ , biological replicates. Two-way ANOVA with Bonferroni post-tests was used in (**b**, **c**). One-way ANOVA with Tukey's multiple comparisons test was used (**d**, **e**). \*\*\* $p \leq 0.001$ .

**a**

| Protein accession | Protein description | Gene name | Position | Amino acid | HCC/ Adjacent tissue Ratio | Regulated Type | Localization probability | Modified sequence          |
|-------------------|---------------------|-----------|----------|------------|----------------------------|----------------|--------------------------|----------------------------|
| P40142            | Transketolase       | Tkt       | 287      | T          | 1.583                      | Up             | 1                        | ILAT(1)PPQEDAPS<br>VDIANIR |

**b**

| site | code | kinase               | peptide         | scores | cut-off |
|------|------|----------------------|-----------------|--------|---------|
| 4    | T    | CMGC/MAPK/JNK/JNK2   | ****ILATPPQEDAP | 36.471 | 6.118   |
| 4    | T    | CK1/VRK/VRK2         | ****ILATPPQEDAP | 25.25  | 4       |
| 4    | T    | CMGC/CDK/CDK5/CDK5   | ****ILATPPQEDAP | 23.889 | 7.867   |
| 4    | T    | CMGC/MAPK/ERK/Erk1   | ****ILATPPQEDAP | 23.25  | 10.326  |
| 4    | T    | CMGC/CDK/CDK2/CDK2   | ****ILATPPQEDAP | 21.43  | 6.826   |
| 4    | T    | CMGC/CDK/CDK5        | ****ILATPPQEDAP | 18.646 | 6.616   |
| 4    | T    | CMGC/MAPK/ERK/Erk2   | ****ILATPPQEDAP | 13.867 | 4.61    |
| 4    | T    | STE/STE7/MEK7        | ****ILATPPQEDAP | 12.833 | 7.32    |
| 4    | T    | CMGC/CDK/CDC2/CDK1   | ****ILATPPQEDAP | 12.451 | 4.168   |
| 4    | T    | Atypical/PIKK/FRAP   | ****ILATPPQEDAP | 12.417 | 8.145   |
| 4    | T    | CMGC/CDK/CDK2/CDC28  | ****ILATPPQEDAP | 12.056 | 9.411   |
| 4    | T    | CMGC/MAPK/p38        | ****ILATPPQEDAP | 11.83  | 4.309   |
| 4    | T    | STE/STE7/MEK7/MAP2K7 | ****ILATPPQEDAP | 11.167 | 6.435   |
| 4    | T    | CMGC/MAPK            | ****ILATPPQEDAP | 10.883 | 4.55    |
| 4    | T    | CAMK/CAMKL/QIK/SIK1  | ****ILATPPQEDAP | 10.188 | 2.597   |

**Fig. S10. Th287 in TKT is phosphorylated in FBXL6-overexpressed tumors**

**a** Th287 in TKT was phosphorylated in HCC tumors of FBXL6 hyperexpression (*Fbxl6; Alb-Cre*) mice. **b** Predicted kinases for TKT phosphorylation at the Th287 site based on GPS2.0 software.

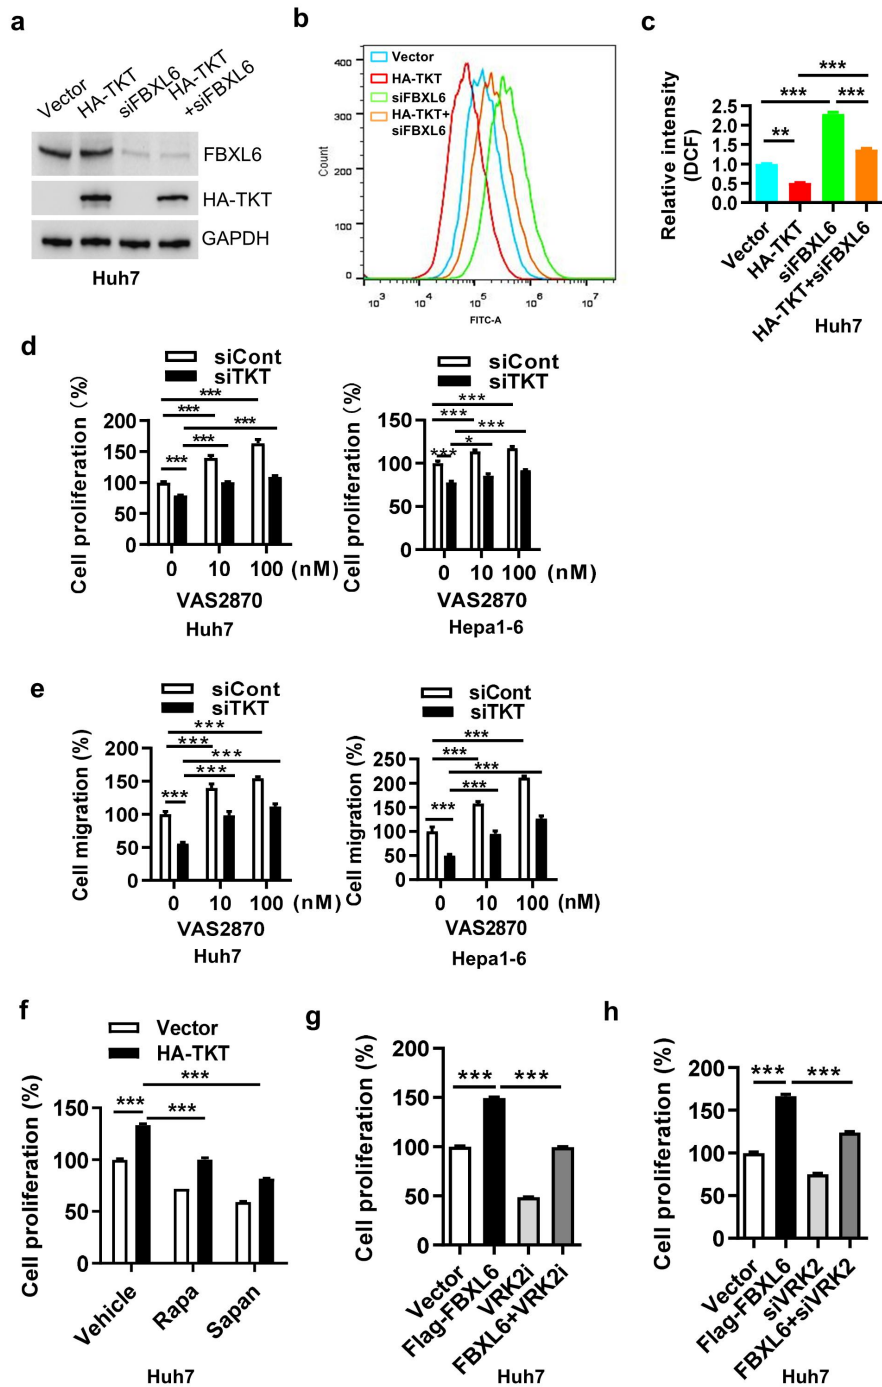

**Fig. S11. TKT-ROS-mTOR-VRK2 axis plays a critical role in FBXL6-mediated HCC proliferation**

**a-c** Huh7 cells were transfected HA-TKT with or without siRNA targeting FBXL6 for



48 h and then analyzed by Western blotting with indicated antibodies (**a**) or ROS analysis after DCFHDA staining (**b, c**). **d, e** Inhibition of ROS rescues TKT knockdown-induced the inhibition of cell proliferation and migration. Huh7 or Hepa1-6 cells were transfected with the indicated siRNA oligos for 24 h. A portion of cells were plated into 96-well plate and then exposed to the ROS inhibitor VAS2870 for 48 h. Cell proliferation was analyzed by CCK-8 assay (**d**). The other portions were plated into Transwell plates overnight with the ROS inhibitor VAS2870, and migration was quantified after crystal violet (0.5% w/v) staining (**e**). **f-h** Huh7 cells were transfected with indicated plasmids or siRNAs in the presence or absence of mTOR inhibitors (Rapamycine 100 nM; Sapanisertib 0.5  $\mu$ M) or VRK2 inhibitor (IC261, 5  $\mu$ M) for 48 h, and then stained with CCK-8 for cell proliferation analysis. Two-way ANOVA with Bonferroni's multiple comparisons test was used in (**d-f**); One-way ANOVA with Tukey's multiple comparisons test was used in (**c, g, h**). \* $p \leq 0.05$ , \*\* $p \leq 0.01$ , \*\*\* $p \leq 0.001$ .

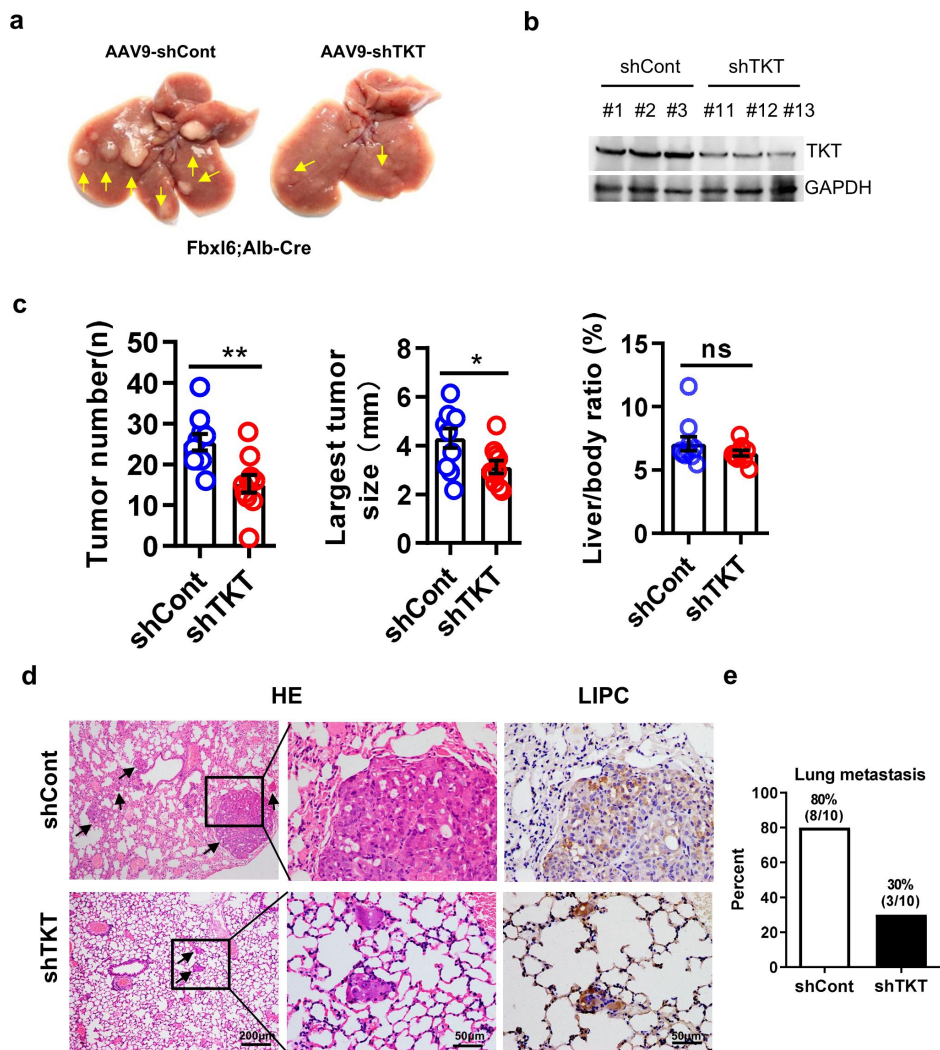

**Fig. S12. Knockdown of TKT protects against FBXL6-triggered hepatocarcinogenesis in vivo**

**a-c** *Fbxl6;Alb-Cre* ( $n = 20$ ) mice were injected with DEN (25 mg/kg, i.p.) at the age of 5 weeks and subsequently administered 28 injections of CCl<sub>4</sub> (0.5 mL/kg) alone or a combination of adeno-associated virus AAV9-shTKT-eGFP-TBG ( $5 \times 10^{10}$ ; liver-restricted expression) after 4 injections of CCl<sub>4</sub>. Mice were sacrificed 19 weeks after DEN. Shown are representative images (**a**), the efficiency of AAV9-shTKT ( $n = 3$  mice per group) (**b**), tumor number, largest tumor size and liver/body weight ratio (**c**). **d** Representative H&E and IHC staining images showing the low rate of distinct lung metastatic foci expressing the hepatocytic marker lipase C after TKT knockdown.

Scale bar, 200  $\mu\text{m}$  or 50  $\mu\text{m}$ . **e** The lung metastasis rate was lower in the TKT knockdown group (30%, 3/10) than in the control group (80%, 8/10).  $n = 10$  mice per group. Arrows indicate tumors. Two-tailed unpaired Student's t-test was used. ns: nonsignificant.  $*p \leq 0.05$ ,  $**p \leq 0.01$ .

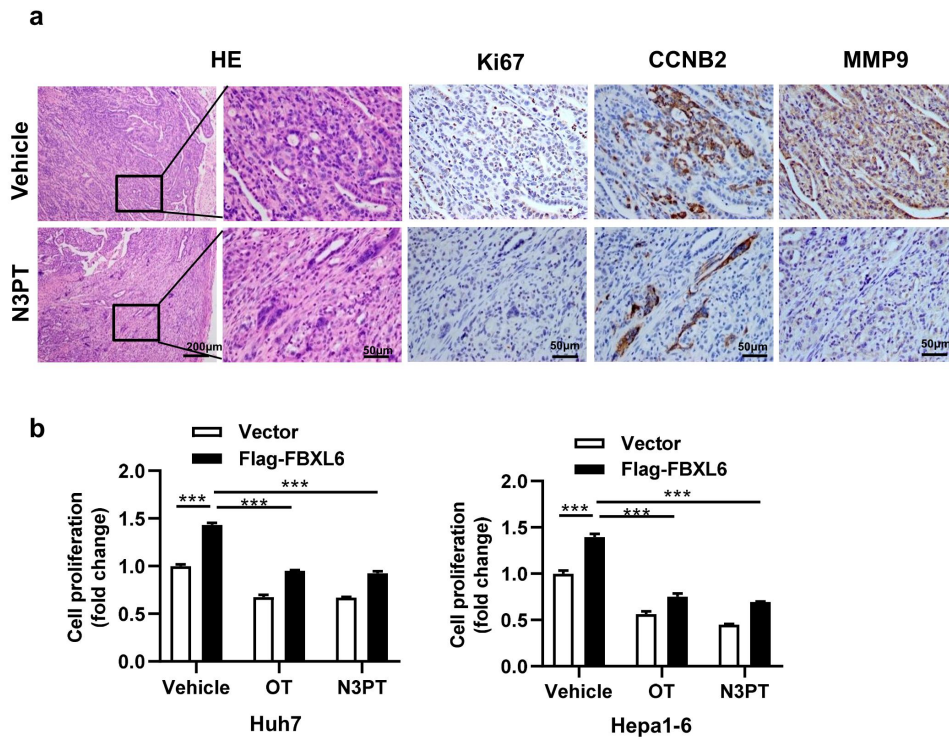

**Fig. S13. Inhibition of TKT reduces proliferation- and metastasis-related markers**

**a** Representative images showing the expression levels of Ki67, CCNB2 and MMP9 in liver tissues of vehicle- and N3PT-treated mice. **b** Huh7 or Hepa1-6 cells were transfected with Flag-FBXL6 for 24 h and then exposed to TKT inhibitors N3PT (0.5  $\mu$ M) or OT (5 mM) for 48 h. Cell proliferation was analyzed by CCK-8 assay. Two-way ANOVA with Bonferroni's multiple comparisons test was used. \*\*\* $p \leq 0.001$ .

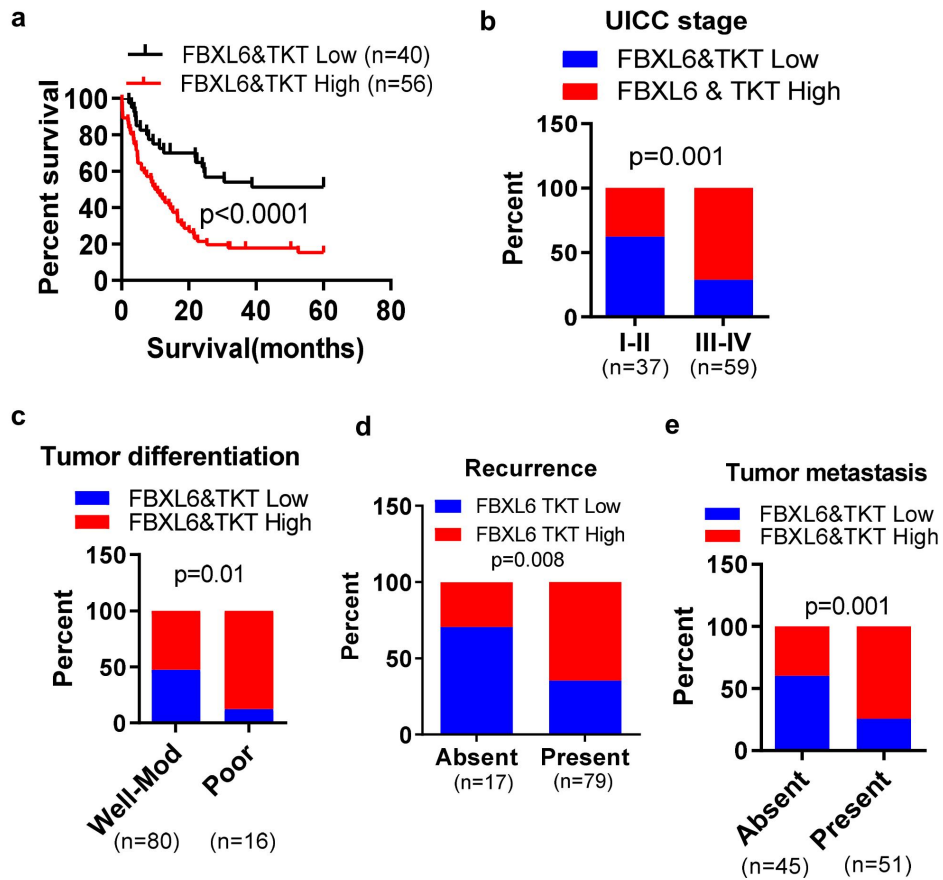

**Fig. S14. Levels of FBXL6 and TKT are positively associated with poor clinical outcomes in HCC patients**

**a** The association between high coexpression of FBXL6/TKT and overall survival in HCC patients was evaluated. The log-rank (Mantel-Cox) test was used.  $p < 0.0001$ .

**b-e** The relationships between high coexpression of FBXL6/TKT protein and UICC stage (**b**), tumor differentiation (**c**), recurrence (**d**), and tumor metastasis (**e**) were determined.

**Supplementary Table 1. Relationship between FBXL6 and clinicopathologic characteristics in the 108 HCC patients of the IHC cohort.**

| Variables          | Cases(%)  | Low FBXL6 | High FBXL6 | P Value      |
|--------------------|-----------|-----------|------------|--------------|
| Age(years)         |           |           |            | 0.223        |
| ≤55                | 82(75.9%) | 30        | 52         |              |
| >55                | 26(24.1%) | 13        | 13         |              |
| Sex                |           |           |            | 0.249        |
| Female             | 15(13.9%) | 8         | 7          |              |
| Male               | 93(86.1%) | 35        | 58         |              |
| Tumor Stage        |           |           |            | <b>0.01</b>  |
| T1/T2              | 59(54.6%) | 30        | 29         |              |
| T3/T4              | 49(45.4%) | 13        | 36         |              |
| Tumor size         |           |           |            | <b>0.01</b>  |
| ≤5cm               | 24(22.2%) | 15        | 9          |              |
| >5cm               | 84(77.8%) | 28        | 56         |              |
| UICC Stage         |           |           |            | <b>0.002</b> |
| I-II               | 43(39.8%) | 25        | 18         |              |
| III-IV             | 65(60.2%) | 18        | 47         |              |
| Histologic Grade   |           |           |            | <b>0.032</b> |
| G1G2               | 92(85.2%) | 41        | 51         |              |
| G3                 | 16(14.8%) | 2         | 14         |              |
| Vascular Thombosis |           |           |            | <b>0.013</b> |
| Absent             | 73(67.6%) | 35        | 38         |              |
| Present            | 35(32.4%) | 8         | 27         |              |
| Recurrence         |           |           |            | <b>0.022</b> |
| Absent             | 19(17.6%) | 12        | 7          |              |
| Present            | 89(82.4%) | 31        | 58         |              |
| Metastasis         |           |           |            | <b>0.001</b> |
| Absent             | 52(48.1%) | 29        | 23         |              |
| Present            | 56(51.9%) | 14        | 42         |              |

**$p < 0.05$  was considered for statistic significance, and was marked in bold.**

**Supplementary Table 2. Univariate and multivariate analyses indicating associations between overall survival and various risk factors in the 108 HCC patients of the IHC cohort**

| Variables                               | N           | OS                    |                  |
|-----------------------------------------|-------------|-----------------------|------------------|
|                                         |             | Hazard ratio(95% CI)# | P value          |
| <b>Univariate analysis</b>              |             |                       |                  |
| FBXL6(high vs. low)                     | (65 vs. 43) | 2.701(1.625-4.489)    | <b>&lt;0.001</b> |
| Age(>55y vs. ≤55y)                      | (26 vs. 82) | 0.772(0.450-1.324)    | 0.347            |
| Gender(male vs. female)                 | (93 vs. 15) | 1.622(0.780-3.377)    | 0.196            |
| Histologic grade(G1G2 vs. G3)           | (92 vs. 16) | 2.170(1.221-3.856)    | <b>0.008</b>     |
| UICC Stage(I II vs. III IV)             | (43 vs. 65) | 4.151(2.409-7.155)    | <b>&lt;0.001</b> |
| Tumor Stage(T1 T2 vs. T3 T4)            | (59 vs. 49) | 3.693(2.281-5.98)     | <b>&lt;0.001</b> |
| Tumor size(>5cm vs. ≤5cm)               | (84 vs. 24) | 3.017(1.546-5.886)    | <b>0.001</b>     |
| Recurrence(Present vs. Absent)          | (89 vs. 19) | 10.111(3.162-32.33)   | <b>&lt;0.001</b> |
| Vascular thrombosis(Present vs. Absent) | (35 vs. 73) | 3.263(2.033-5.236)    | <b>&lt;0.001</b> |
| Metastasis(Present vs. Absent)          | (56 vs. 52) | 3.136(1.929-5.099)    | <b>&lt;0.001</b> |
| <b>Multivariate analysis</b>            |             |                       |                  |
| FBXL6(high vs. low)                     | (65 vs. 43) | 2(1.188-3.367)        | <b>0.009</b>     |
| Histologic grade (G1G2 vs. G3)          | (92 vs. 16) | NA                    | NA               |
| UICC Stage(I II vs. III IV)             | (43 vs. 65) | NA                    | NA               |
| Tumor Stage(T1 T2 vs. T3 T4)            | (59 vs. 49) | 2.364(1.442-3.875)    | <b>0.001</b>     |
| Tumor size(>5cm vs. ≤5cm)               | (84 vs. 24) | NA                    | NA               |
| Recurrence(Present vs. Absent)          | (89 vs. 19) | 7.151(2.188-23.367)   | <b>0.001</b>     |
| Vascular thrombosis(Present vs. Absent) | (35 vs. 73) | NA                    | NA               |
| Metastasis(Present vs. Absent)          | (56 vs. 52) | NA                    | NA               |

**$p < 0.05$  was considered for statistic significance, and was marked in bold.**

**Supplementary Table 3. Relationship between VRK2 and clinicopathologic characteristics in the 121 HCC patients of the IHC cohort.**

| Variables          | Cases | Low VRK2 | High VRK2 | P Value      |
|--------------------|-------|----------|-----------|--------------|
| Age(years)         | 121   | 53       | 68        | 0.982        |
| <55                | 89    | 39       | 50        |              |
| ≥55                | 32    | 14       | 18        |              |
| Gender             |       |          |           | 0.578        |
| Female             | 17    | 9        | 8         |              |
| Male               | 104   | 44       | 60        |              |
| TNM Stage          |       |          |           | <b>0.001</b> |
| I - II             | 53    | 34       | 19        |              |
| III - IV           | 68    | 19       | 49        |              |
| Histologic Grade   |       |          |           | 0.358        |
| G1G2               | 102   | 47       | 55        |              |
| G3                 | 19    | 6        | 13        |              |
| Tumor Size         |       |          |           | <b>0.003</b> |
| ≤5cm               | 29    | 20       | 9         |              |
| >5cm               | 92    | 33       | 59        |              |
| Recurrence         |       |          |           | <b>0.007</b> |
| Absent             | 34    | 22       | 12        |              |
| Present            | 87    | 31       | 56        |              |
| Vascular Thombosis |       |          |           | <b>0.018</b> |
| Absent             | 86    | 44       | 42        |              |
| Present            | 35    | 9        | 26        |              |
| Metastasis         |       |          |           | <b>0.001</b> |
| Present            | 63    | 14       | 49        |              |
| Absent             | 58    | 39       | 19        |              |

*p* < 0.05 was considered for statistic significance, and was marked in bold.



**Supplementary Table 4. Univariate and multivariate analyses indicating associations between overall survival and various risk factors in the 121 HCC patients of the IHC cohort**

| Variables                              | N            | OS                    |                  |
|----------------------------------------|--------------|-----------------------|------------------|
|                                        |              | Hazard ratio(95% CI)# | P value          |
| <b>Univariate analysis</b>             |              |                       |                  |
| VRK2(high vs. low)                     | (68 vs. 53)  | 0.3634(0.2314-0.5706) | <b>&lt;0.001</b> |
| Age(>=55y vs. <55y)                    | (32 vs. 89)  | 0.8666(0.5396-1.392)  | 0.554            |
| Gender(male vs. female)                | (104 vs. 17) | 1.324(0.7208-2.433)   | 0.365            |
| Histologic grade(G1G2 vs. G3)          | (102 vs. 19) | 0.8444(0.4849-1.471)  | 0.55             |
| TNM Stage(I II vs. III IV)             | (53 vs. 68)  | 3.686(2.317-5.863)    | <b>&lt;0.001</b> |
| Tumor size(>5cm vs. <=5cm)             | (92 vs. 29)  | 2.297(1.317-4.006)    | <b>0.0034</b>    |
| Recurrence(Present vs. Absent)         | (87 vs. 34)  | 2.738(1.529-4.902)    | <b>&lt;0.001</b> |
| Vascular Thombosis(Present vs. Absent) | (35 vs. 86)  | 2.791(1.786-4.361)    | <b>&lt;0.001</b> |
| Metastasis(Present vs. Absent)         | (63 vs. 58)  | 2.471(1.597-3.821)    | <b>&lt;0.001</b> |
| <b>Multivariate analysis</b>           |              |                       |                  |
| VRK2(high vs. low)                     | (68 vs. 53)  | 0.5744(0.3352-0.9841) | <b>0.0435</b>    |
| TNM Stage(I II vs. III IV)             | (53 vs. 68)  | 2.6768(1.4171-5.0564) | <b>0.0024</b>    |
| Tumor size(>5cm vs. <=5cm)             | (92 vs. 29)  | 1.0846(0.561-2.097)   | 0.809            |
| Recurrence(Present vs. Absent)         | (87 vs. 34)  | 1.9908(1.0551-3.7563) | <b>0.033</b>     |
| Vascular Thombosis(Present vs. Absent) | (35 vs. 86)  | 1.3872(0.7861-2.4477) | 0.258            |
| Metastasis(Present vs. Absent)         | (63 vs. 58)  | 0.7693(0.4105-1.4418) | 0.413            |

**$p < 0.05$  was considered for statistic significance, and was marked in bold.**

**Supplementary Table 5. Relationship between activated p-TKT(T287) and clinicopathologic characteristics in the 121 HCC patients of the IHC cohort**

| Variables          | Cases | Low         | High         | P Value      |
|--------------------|-------|-------------|--------------|--------------|
|                    |       | p-TKT(T287) | p-TKT (T287) |              |
| Age(years)         | 121   | 56          | 65           | 0.588        |
| <55                | 89    | 43          | 46           |              |
| ≥55                | 32    | 13          | 19           |              |
| Gender             |       |             |              | 0.74         |
| Female             | 17    | 9           | 8            |              |
| Male               | 104   | 47          | 57           |              |
| TNM Stage          |       |             |              | <b>0.001</b> |
| I - II             | 53    | 36          | 17           |              |
| III - IV           | 68    | 20          | 48           |              |
| Histologic Grade   |       |             |              | 0.883        |
| G1G2               | 102   | 48          | 54           |              |
| G3                 | 19    | 8           | 11           |              |
| Tumor Size         |       |             |              | 0.082        |
| ≤5cm               | 29    | 18          | 11           |              |
| >5cm               | 92    | 38          | 54           |              |
| Recurrence         |       |             |              | <b>0.019</b> |
| Absent             | 34    | 22          | 12           |              |
| Present            | 87    | 34          | 53           |              |
| Vascular Thombosis |       |             |              | 0.137        |
| Absent             | 86    | 44          | 42           |              |
| Present            | 35    | 12          | 23           |              |
| Metastasis         |       |             |              | <b>0.001</b> |
| Present            | 63    | 19          | 44           |              |
| Absent             | 58    | 37          | 21           |              |

*p* < 0.05 was considered for statistic significance, and was marked in bold.

**Supplementary Table 6. Primers used for qRT-PCR**

| Gene symbol        | Forward                      | Reverse                |
|--------------------|------------------------------|------------------------|
| <i>Mouse Icam1</i> | CTGGGCTTGGAGACTCAGTG         | CCACACTCTCCGAAACGAA    |
| <i>Mouse Vcam1</i> | CTGGGAAGCTGGAACGAAGT         | GCCAAACACTTGACCGTGAC   |
| <i>Mouse Upa</i>   | CTTCCCACTACCTTGGCTGG         | AGACAGCAGTTCTCCCAAG    |
| <i>Mouse Ccl2</i>  | AAAAACCTGGATCGGAACCAA        | AGGTTTCTTCGCCACCTGAG   |
| <i>Mouse Mmp9</i>  | GTGTGTTCCCGTTCATCTTT         | TTATCCTGGTCATAGTTGGCT  |
| <i>Mouse Fbx16</i> | TCTGGTTGGGGAGACCGTAT         | TCTGGAGCTGAGAGAACCGA   |
| <i>Mouse Tkt</i>   | CATCATCGTGGACGGACACA         | ATGTTTTTGGGGAGGGGCTT   |
| <i>Mouse Vrk2</i>  | GCCCAACAAAAAGAAAAGTCA<br>AGG | TGTACCGAGGCAGGGATCTT   |
| <i>Mouse Pd-11</i> | GGGCGTTTACTATCACGGCT         | AGGGCAGCATTTCCTTCAA    |
| <i>Mouse Gapdh</i> | AGACGGCCGCATCTTCTT           | TTCACACCGACCTTCACCAT   |
| <i>Human Icam1</i> | CACGCCTCCCTGAACCTATC         | ATCAGATGCGTGGCCTAGTG   |
| <i>Human Vcam1</i> | AATGCCTGGGAAGATGGTCG         | GATGTGGTCCCCTCATTCGT   |
| <i>Human Upa</i>   | CCAAAATGCTGTGTGCTGCT         | GCCAGGCCATTCTCTTCCTT   |
| <i>Human Ccl2</i>  | CCCCAGTCACCTGCTGTTAT         | GAGTTTGGGTTTGCTTGTCC   |
| <i>Human Mmp9</i>  | TTTGAGTCCGGTGGACGATG         | GCTCCTCAAAGACCGAGTCC   |
| <i>Human Gapdh</i> | TGGCACCGTCAAGGCTGAGAA        | TGGTGAAGACGCCAGTGGACTC |
